# Supplementary material for: Dynamic Influence Maximization via Network Representation Learning
Source: Frontiers journal article supplement (doi:10.3389/fphy.2021.827468), 2022-02-22
Supplement: Data_Sheet_1.docx [file Data_Sheet_1.docx]

Supplementary Material

# Supplementary Tables

**Supplementary table 1** Statistics of four real-world network datasets.

| Datasets | Initial nodes | Final nodes | Nodes growth | Initial edges | Final edges | Edges growth |
| --- | --- | --- | --- | --- | --- | --- |
| NetHEPT | 2169 | 14518 | 559% | 4675 | 125029 | 2574% |
| Twitter | 7580 | 18470 | 144% | 11353 | 48053 | 323% |
| UCI | 505 | 1899 | 276% | 1617 | 13838 | 756% |
| Wikipedia | 552 | 7115 | 1189% | 3163 | 100753 | 3085% |
